# Supplementary material for: Type-Specific Cell Line Models for Type-Specific Ovarian Cancer Research
Source: PubMed Central journal article supplement (PMC3762837; doi:10.1371/journal.pone.0072162), 2013-09-04
Supplement: pone.0072162.s001.pdf [file pone.0072162.s001.pdf]

## Supplemental Figure S1

DEL:  
TTGCATTCTGGGACAGCCAAGTCTGTGACTTGACAGgtcagttgccctgaggggctggcttccatgagacttcaatgcct  
ggccgtatccccctgcatttctttgtttggactttgggattcctc

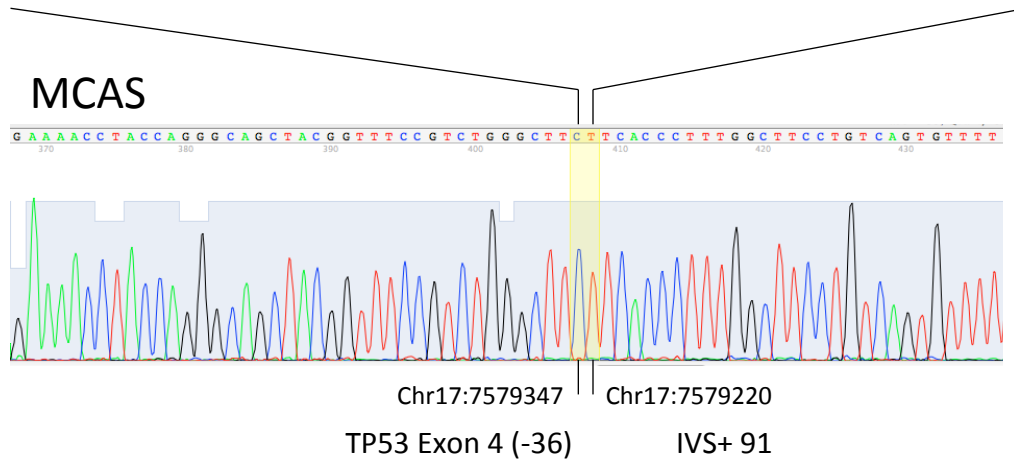

Supplemental Fig S1: 127bp homozygous (or hemizygous) deletion affecting *TP53* exon 4 in the MCAS mucinous carcinoma cell line. This mutation was apparent by Sanger sequencing though not annotated in the CCLE database. Coding bases are annotated in upper case.
