# Supplementary material for: Type-Specific Cell Line Models for Type-Specific Ovarian Cancer Research
Source: PubMed Central journal article supplement (PMC3762837; doi:10.1371/journal.pone.0072162), 2013-09-04
Supplement: pone.0072162.s002.pdf [file pone.0072162.s002.pdf]

Supplemental Table S1: Cell Lines &amp; Sources

| Cell Line         | Reported Histotype  | Media           | SOURCE                                                   | STR Reference                   |
|-------------------|---------------------|-----------------|----------------------------------------------------------|---------------------------------|
| <b>2008</b>       | ENOCa               | RPMI/10% FBS    | UC Denver (via M. Spillman; no public repository source) | Korch et al.                    |
| <b>A2780</b>      | Adenocarcinoma      | RPMI/10% FBS    | ECACC (via I. Campbell)                                  | ATCC                            |
| <b>CAOV3</b>      | Adenocarcinoma      | 199/105 5% FBS  | ATCC                                                     | ATCC                            |
| <b>COLO-704</b>   | Carcinoma           | RPMI/10% FBS    | UC Denver cell bank (via M. Spillman)                    | DSMZ STR Profiler/ Korch et al. |
| <b>COLO-720E</b>  | Carcinoma           | RPMI/10% FBS    | UC Denver cell bank (via M. Spillman)                    | DSMZ STR Profiler/ Korch et al. |
| <b>ES-2</b>       | CCC                 | RPMI/10% FBS    | ATCC                                                     | ATCC                            |
| <b>HEY</b>        | Carcinoma           | RPMI/10% FBS    | ATCC (via UC Denver/M. Spillman)                         | DSMZ STR Profiler/ Korch et al. |
| <b>IGROV1</b>     | Cystoadenocarcinoma | McCoy 5A 5% FBS | NCI cell bank                                            | Cell Miner                      |
| <b>JHOC-5</b>     | CCC                 | RPMI/10% FBS    | RIKEN Cell Bank                                          | RIKEN (DSMZ STR Profiler)       |
| <b>JHOC-7</b>     | CCC                 | RPMI/10% FBS    | RIKEN Cell Bank                                          | RIKEN (DSMZ STR Profiler)       |
| <b>JHOC-9</b>     | CCC                 | RPMI/10% FBS    | RIKEN Cell Bank                                          | RIKEN (DSMZ STR Profiler)       |
| <b>Kuramochi</b>  | Undifferentiated    | RPMI/10% FBS    | HSRRB Cell Bank                                          | HSRRB                           |
| <b>MCAS</b>       | Mucinous            | RPMI/10% FBS    | JCRB Cell Bank (via UC Denver/M. Spillman)               | DSMZ STR Profiler/ Korch et al. |
| <b>OV90</b>       | Adenocarcinoma      | 199/105 5% FBS  | ATCC                                                     | ATCC                            |
| <b>OVCAR-3</b>    | Adenocarcinoma      | 199/105 5% FBS  | T.C. Hamilton (via N. Auersperg)                         | ATCC/Cell Miner                 |
| <b>OVCAR-4</b>    | Adenocarcinoma      | 199/105 5% FBS  | T.C. Hamilton (via N. Auersperg)                         | ATCC/Cell Miner                 |
| <b>OVCAR-5</b>    | Adenocarcinoma      | 199/105 5% FBS  | T.C. Hamilton (via N. Auersperg)                         | ATCC/Cell Miner                 |
| <b>OVCAR-8</b>    | Adenocarcinoma      | 199/105 5% FBS  | NCI cell bank (via P. Olive)                             | ATCC/Cell Miner                 |
| <b>OVISE</b>      | CCC                 | RPMI/10% FBS    | JCRB Cell Bank (via J.Brenton)                           | JCRB                            |
| <b>OVMANA</b>     | CCC                 | RPMI/10% FBS    | JCRB Cell Bank (via J.Brenton)                           | JCRB                            |
| <b>OVSAYO</b>     | adenocarcinoma      | RPMI/10% FBS    | JCRB Cell Bank (via J.Brenton)                           | JCRB                            |
| <b>OVTOKO</b>     | CCC                 | RPMI/10% FBS    | JCRB Cell Bank (via J.Brenton)                           | JCRB                            |
| <b>RMG-1</b>      | CCC                 | RPMI/10% FBS    | HSRRB Cell Bank                                          | HSRRB                           |
| <b>RMG-2</b>      | CCC                 | RPMI/10% FBS    | HSRRB Cell Bank                                          | HSRRB                           |
| <b>SKOV3</b>      | adenocarcinoma      | 199/105 5% FBS  | ATCC                                                     | ATCC                            |
| <b>TOV112D</b>    | ENOCa               | 199/105 5% FBS  | ATCC                                                     | ATCC                            |
| <b>TOV21G</b>     | CCC                 | 199/105 5% FBS  | ATCC                                                     | ATCC                            |
| <b>VOA1056_CL</b> | LGSC                | 199/105 10%FBS  | OvCaRe derived (C. Salamanca)                            | OvCaRe (primary tumour)         |
| <b>VOA1072_CL</b> | HGSC                | 199/105 10%FBS  | OvCaRe derived (C. Salamanca)                            | OvCaRe (primary tumour)         |
| <b>VOA1312_CL</b> | LGSC                | 199/105 10%FBS  | OvCaRe derived (C. Salamanca)                            | OvCaRe (primary tumour)         |
| <b>VOA1400_CL</b> | HGSC                | 199/105 10%FBS  | OvCaRe derived (C. Salamanca)                            | OvCaRe (primary tumour)         |
| <b>VOA1416_CL</b> | HGSC                | 199/105 10%FBS  | OvCaRe derived (C. Salamanca)                            | OvCaRe (primary tumour)         |
