# Supplementary material for: Type-Specific Cell Line Models for Type-Specific Ovarian Cancer Research
Source: PubMed Central journal article supplement (PMC3762837; doi:10.1371/journal.pone.0072162), 2013-09-04
Supplement: pone.0072162.s003.pdf [file pone.0072162.s003.pdf]

Supplemental Table S2: Antibodies and Dilutions

| Antibody        | Supplier         | Catalogue #   | Host   | Clone      | Staining Platform    | Detection System | Antigen Retrieval | 1° Antibody         | 2° Antibody                                   | 3° Antibody                  |
|-----------------|------------------|---------------|--------|------------|----------------------|------------------|-------------------|---------------------|-----------------------------------------------|------------------------------|
| <b>DKK1</b>     | R&D Systems      | AF1096        | Goat   | Polyclonal | Ventana Discovery XT | ChromoMap DAB    | Protease 2, 8 min | 1:25, 2 hr, no heat | 1:500, Jackson unconj. Rb anti-Gt IgG, 32 min | UltraMap anti-Rb HRP, 16 min |
| <b>HNF1B</b>    | Sigma-Aldrich    | HPA002083     | Rabbit | Polyclonal | Ventana Discovery XT | DAB Map          | CC1, Standard     | 1:100, 1 hr, heat   | Universal Secondary, 32 min                   | n/a                          |
| <b>MDM2</b>     | Zymed            | 18-2403       | Mouse  | IF2        | Ventana Discovery XT | ChromoMap DAB    | CC1, Standard     | 1:50, 1 hr, no heat | UltraMap anti-Ms HRP, 16 min                  | n/a                          |
| <b>P16</b>      | mtm laboratories | 9518          | Mouse  | E6H4       | Ventana Discovery XT | ChromoMap DAB    | CC1, Standard     | 1:2, 2 hr, no heat  | UltraMap anti-Ms HRP, 16 min                  | n/a                          |
| <b>P53</b>      | Dako             | M7001         | Mouse  | DO-7       | Ventana Discovery XT | DAB Map          | CC1, Standard     | 1:400, 1 hr, heat   | Universal Secondary, 32 min                   | n/a                          |
| <b>PR</b>       | Ventana          | 790-2223      | Rabbit | 1E2        | Ventana Discovery XT | DAB Map          | CC1, Standard     | neat, 8 min, heat   | Universal Secondary, 32 min                   | n/a                          |
| <b>TFF3</b>     | Abnova           | H00007033-M01 | Mouse  | 3D9        | Ventana Discovery XT | DAB Map          | CC2, Standard     | 1:50, 1 hr, heat    | Universal Secondary, 32 min                   | n/a                          |
| <b>Vimentin</b> | Zymed            | 18-0052       | Mouse  | V9         | Ventana Discovery XT | DAB Map          | CC2, Mild         | 1:50, 32 min, heat  | Universal Secondary, 32 min                   | n/a                          |
| <b>ARID1A</b>   | Sigma-Aldrich    | HPA005456     | Rabbit | Polyclonal | Ventana Discovery XT | DAB Map          | CC1, Standard     | 1:75, 1 hr, heat    | Universal Secondary, 32 min                   | n/a                          |
| <b>WT1</b>      | Dako             | M3561         | Mouse  | 6F-H2      | Ventana Discovery XT | DAB Map          | CC1, Standard     | 1:50, 1 hr, heat    | Universal Secondary, 32 min                   | n/a                          |
