# Supplementary material for: Type-Specific Cell Line Models for Type-Specific Ovarian Cancer Research
Source: PubMed Central journal article supplement (PMC3762837; doi:10.1371/journal.pone.0072162), 2013-09-04
Supplement: pone.0072162.s005.pdf [file pone.0072162.s005.pdf]

Supplemental Table S4: Mutations Found In Ovarian Carcinoma Cell Lines

| Cell Line / Mutation tested | Present in CCLE | BRAF V599/V600 | KRAS G12/G13 | ERBB2 ins. 774-781 | NRAS.1 G12/G13 | NRAS.2 G60/G61 | CTNNB1 32,33,34,35,38,41,45 | EGFR.1 868 | EGFR.2 740-750 | EGFR.3 770 | PTEN.1 383_391delA GGGACGAA | PTEN.2 130 | PTEN.3 173   | PTEN.3 233 | PIK3CA.1 542-546 | PIK3CA.2 1047 | PPP2R1A | DICER1.1 1705/1709 | DICER1.1 1818/1813 | TP53 mutation | TP53 Mutation TYPE | ARID1A Mutations truncating (NS/Frame) mutations only |                                                                           |
|-----------------------------|-----------------|----------------|--------------|--------------------|----------------|----------------|-----------------------------|------------|----------------|------------|-----------------------------|------------|--------------|------------|------------------|---------------|---------|--------------------|--------------------|---------------|--------------------|-------------------------------------------------------|---------------------------------------------------------------------------|
| A2780                       | YES             | nc             | nc           | nc                 | nc             | nc             | nc                          | nc         | nc             | nc         | nc                          | nc         | nc           | nc         | nc               | nc            | nc      | nc                 | nc                 | nc            | nc                 | nc                                                    | p.Q1430* / p.R1721fs                                                      |
| CAOV3                       | YES             | nc             | nc           | nc                 | nc             | nc             | nc                          | nc         | nc             | nc         | nc                          | nc         | nc           | nc         | nc               | nc            | nc      | nc                 | nc                 | nc            | nc                 | nc                                                    |                                                                           |
| ES-2                        | YES             | V600E          | nc           | nc                 | nc             | nc             | nc                          | nc         | nc             | nc         | nc                          | nc         | nc           | nc         | nc               | nc            | nc      | nc                 | nc                 | nc            | nc                 | nc                                                    | p.Q136* Nonsense Mutation                                                 |
| IGROV1                      | YES             | nc             | nc           | nc                 | nc             | nc             | nc                          | nc         | nc             | nc         | nc                          | nc         | nc           | nc         | nc               | nc            | nc      | nc                 | nc                 | nc            | nc                 | nc                                                    | p.S241F Missense Mutation                                                 |
| JHOC-5                      | YES             | nc             | nc           | nc                 | nc             | nc             | nc                          | nc         | nc             | nc         | nc                          | nc         | nc           | nc         | nc               | nc            | nc      | nc                 | nc                 | nc            | nc                 | nc                                                    | p.Y126C Missense Mutation                                                 |
| JHOC-7                      | NO              | nc             | nc           | nc                 | nc             | nc             | nc                          | nc         | nc             | nc         | nc                          | nc         | nc           | nc         | nc               | nc            | nc      | nc                 | nc                 | nc            | nc                 | nc                                                    |                                                                           |
| JHOC-9                      | NO              | nc             | nc           | nc                 | nc             | nc             | nc                          | nc         | nc             | nc         | nc                          | nc         | nc           | nc         | nc               | nc            | nc      | nc                 | nc                 | nc            | nc                 | nc                                                    | p.E1779*                                                                  |
| Kuramochi                   | YES             | nc             | nc           | nc                 | nc             | nc             | nc                          | nc         | nc             | nc         | nc                          | nc         | nc           | nc         | nc               | nc            | nc      | nc                 | nc                 | nc            | nc                 | nc                                                    | p.D281Y Missense Mutation                                                 |
| OV90                        | YES             | nc             | nc           | nc                 | nc             | nc             | nc                          | nc         | nc             | nc         | nc                          | nc         | nc           | nc         | nc               | nc            | nc      | nc                 | nc                 | nc            | nc                 | nc                                                    | p.S215R Missense Mutation                                                 |
| OVCAR-3                     | YES             | nc             | nc           | nc                 | nc             | nc             | nc                          | nc         | nc             | nc         | nc                          | nc         | nc           | nc         | nc               | nc            | nc      | nc                 | nc                 | nc            | nc                 | nc                                                    | p.R248Q Missense Mutation                                                 |
| OVCAR-4                     | YES             | nc             | nc           | nc                 | nc             | nc             | nc                          | nc         | nc             | nc         | nc                          | nc         | nc           | nc         | nc               | nc            | nc      | nc                 | nc                 | nc            | nc                 | nc                                                    | p.L130V Missense Mutation                                                 |
| OVCAR-5                     | NO              | nc             | G12V         | nc                 | nc             | nc             | nc                          | nc         | nc             | nc         | nc                          | nc         | nc           | nc         | nc               | nc            | nc      | nc                 | nc                 | nc            | nc                 | nc                                                    |                                                                           |
| OVCAR-8                     | YES             | nc             | nc           | W746C              | nc             | nc             | nc                          | nc         | nc             | nc         | nc                          | nc         | nc           | nc         | nc               | nc            | nc      | nc                 | nc                 | nc            | nc                 | nc                                                    | p.Y126_splice Splice Site SNP                                             |
| OVISE                       | YES             | nc             | nc           | nc                 | nc             | nc             | nc                          | nc         | nc             | nc         | nc                          | nc         | nc           | nc         | nc               | nc            | nc      | nc                 | nc                 | nc            | nc                 | nc                                                    |                                                                           |
| OVMANA                      | YES             | nc             | nc           | nc                 | nc             | nc             | nc                          | nc         | nc             | nc         | nc                          | nc         | nc           | nc         | nc               | nc            | nc      | nc                 | nc                 | nc            | nc                 | nc                                                    | p.Q1332* / p.S2264*                                                       |
| OVSAYO                      | NO              | nc             | nc           | nc                 | nc             | nc             | S37F                        | nc         | nc             | nc         | nc                          | nc         | nc           | nc         | nc               | H1047R        | nc      | nc                 | nc                 | nc            | nc                 | nc                                                    | R249M(Hm) Missense Mutation                                               |
| OVTOKO                      | YES             | nc             | nc           | nc                 | nc             | nc             | nc                          | nc         | nc             | nc         | nc                          | nc         | nc           | nc         | nc               | nc            | nc      | nc                 | nc                 | nc            | nc                 | nc                                                    |                                                                           |
| RMG-1                       | YES             | nc             | nc           | nc                 | nc             | nc             | nc                          | nc         | nc             | nc         | nc                          | nc         | nc           | nc         | nc               | nc            | nc      | nc                 | nc                 | nc            | nc                 | nc                                                    |                                                                           |
| RMG-2                       | NO              | nc             | nc           | nc                 | nc             | nc             | nc                          | nc         | nc             | nc         | nc                          | nc         | nc           | nc         | nc               | nc            | R183W   | nc                 | nc                 | nc            | nc                 | nc                                                    |                                                                           |
| SKOV3                       | YES             | nc             | nc           | nc                 | nc             | nc             | nc                          | nc         | nc             | nc         | nc                          | nc         | nc           | nc         | nc               | H1047Y        | nc      | nc                 | nc                 | nc            | nc                 | nc                                                    | p.Q586*                                                                   |
| TOV112D                     | YES             | nc             | nc           | nc                 | nc             | nc             | S37A                        | nc         | nc             | nc         | nc                          | nc         | nc           | nc         | nc               | nc            | nc      | nc                 | nc                 | nc            | nc                 | nc                                                    | R175H Missense Mutation                                                   |
| TOV21G                      | YES             | nc             | G13C         | nc                 | nc             | nc             | nc                          | nc         | nc             | nc         | 148delG                     | nc         | indel 800del | nc         | H1047Y           | nc            | nc      | nc                 | nc                 | nc            | nc                 | nc                                                    | p.Q548fs / p.N756fs                                                       |
| VOA1056_CL                  | NO              | nc             | nc           | nc                 | nc             | Q61R           | nc                          | nc         | nc             | nc         | nc                          | nc         | nc           | nc         | nc               | nc            | nc      | nc                 | nc                 | nc            | nc                 | nc                                                    |                                                                           |
| VOA1072_CL                  | NO              | nc             | nc           | nc                 | nc             | nc             | nc                          | nc         | nc             | nc         | nc                          | nc         | nc           | nc         | nc               | nc            | nc      | nc                 | nc                 | nc            | nc                 | nc                                                    | R248Q(Hm) Missense Mutation                                               |
| VOA1312_CL                  | NO              | nc             | G12V         | nc                 | nc             | nc             | nc                          | nc         | nc             | nc         | nc                          | nc         | nc           | nc         | nc               | nc            | nc      | nc                 | nc                 | nc            | nc                 | nc                                                    |                                                                           |
| VOA1400_CL                  | NO              | nc             | nc           | nc                 | nc             | nc             | nc                          | nc         | nc             | nc         | nc                          | nc         | nc           | nc         | nc               | nc            | nc      | nc                 | nc                 | nc            | nc                 | nc                                                    | E198* Nonsense Mutation                                                   |
| VOA1416_CL                  | NO              | nc             | nc           | nc                 | nc             | nc             | nc                          | nc         | nc             | nc         | nc                          | nc         | nc           | nc         | nc               | nc            | nc      | nc                 | nc                 | nc            | nc                 | nc                                                    |                                                                           |
| 2008                        | NO              | nc             | nc           | nc                 | nc             | nc             | nc                          | nc         | nc             | nc         | nc                          | nc         | nc           | nc         | nc               | nc            | nc      | nc                 | nc                 | nc            | nc                 | nc                                                    | c.572_574 delCTC (het) / c.673-1 G>T (het, splice site) Nonsense Mutation |
| COLO-704                    | YES             | nc             | nc           | nc                 | nc             | nc             | nc                          | nc         | nc             | nc         | R130* (Hm)                  | nc         | nc           | nc         | nc               | nc            | nc      | nc                 | nc                 | nc            | nc                 | nc                                                    | c.1146delA (het) Nonsense Mutation                                        |
| COLO-720E                   | NO              | nc             | nc           | nc                 | nc             | nc             | nc                          | nc         | nc             | nc         | R130* (Hm)                  | nc         | nc           | nc         | nc               | nc            | nc      | nc                 | nc                 | nc            | nc                 | nc                                                    | p.A138V (het) / c.1118delA (het) Nonsense Mutation                        |
| MCAS                        | YES             | nc             | G12D         | nc                 | nc             | nc             | nc                          | nc         | nc             | nc         | nc                          | nc         | nc           | nc         | nc               | H1047R        | nc      | nc                 | nc                 | nc            | nc                 | nc                                                    | 127bp Del, Ex 4 Nonsense Mutation                                         |
| HEY                         | HEY-A1          | nc             | G12D         | nc                 | nc             | nc             | nc                          | nc         | nc             | nc         | nc                          | nc         | nc           | nc         | nc               | nc            | nc      | nc                 | nc                 | nc            | nc                 | nc                                                    |                                                                           |

NC - no change detected

ERBB2 (W746C) - unknown significance not reported in COSMIC

All mutation are heterozygous unless noted as (Hm) = Homozygous/Hemizygous
