# Supplementary material for: Type-Specific Cell Line Models for Type-Specific Ovarian Cancer Research
Source: PubMed Central journal article supplement (PMC3762837; doi:10.1371/journal.pone.0072162), 2013-09-04
Supplement: pone.0072162.s006.pdf [file pone.0072162.s006.pdf]

**Supplemental Table S5: Mismatch Repair IHC**

| Cell Line   | Group 1 |       | Group 2 |       |
|-------------|---------|-------|---------|-------|
|             | MLH-1   | PMS-2 | MSH-2   | MSH-6 |
| 2008        | 1       | 1     | 1       | 1     |
| A2780       | 0       | 0     | 1       | 1     |
| CAOV3       | 1       | 1     | 1       | 1     |
| COLO-704    | 0       | 0     | 1       | 1     |
| COLO-720E   | 0       | 0     | 1       | 1     |
| ES-2        | 1       | 1     | 1       | 1     |
| HEY         | 1       | 1     | 1       | 1     |
| IGROV1      | 0       | 0     | 0       | 0     |
| JHOC-5      | 1       | 1     | 1       | 1     |
| JHOC-7      | 1       | 1     | 1       | 1     |
| JHOC-9      | 1       | 1     | 1       | 1     |
| Kuramochi   | 1       | 1     | 1       | 1     |
| MCAS        | 1       | 1     | 1       | 1     |
| OV90        | N/A     | N/A   | N/A     | N/A   |
| OVCAR-3**   | 1       | 1     | 1       | 1     |
| OVCAR-4     | 1       | 1     | 1       | 1     |
| OVCAR-5     | 1       | 1     | 1       | 1     |
| OVCAR-8     | 1       | 1     | 1       | 1     |
| OVICE       | 1       | 1     | 1       | 1     |
| OVMANA      | 1       | 1     | 1       | 1     |
| OVSAYO      | 1       | 1     | 1       | 1     |
| OVTOKO      | 1       | 1     | 1       | 1     |
| RMG-1       | 1       | 1     | 1       | 1     |
| RMG-2       | 1       | 1     | 1       | 1     |
| SKOV3**     | 0       | 0     | 1       | 1     |
| TOV112D     | 1       | 1     | 1       | 1     |
| TOV21G      | 0       | 0     | 1       | 1     |
| VOA1056_CL* | 1       | 1     | 1       | 1     |
| VOA1072_CL* | 1       | 1     | 1       | 1     |
| VOA1312_CL  | 1       | 1     | 1       | 1     |
| VOA1400_CL* | 1       | 1     | 1       | 1     |
| VOA1416_CL* | 1       | 1     | 1       | 1     |

\* results verified in primary tissue AND derivative cell line

1 - nuclear protein, 0 - no detectable protein (presumed MMR deficient)

\*\* reported in Taverna P et al. (Cancer Chemother Pharmacol. 2000;46(6):507-16)
